# Supplementary material for: A low-cost 2D WO3/Ni3S2 heterojunction for highly stable hydrogen evolution
Source: Royal Society of Chemistry journal article supplement (doi:10.1039/d1qm01218e), 2021-01-01
Supplement: d1qm01218e1.pdf [file d1qm01218e1.pdf]

## AA Low-cost 2D WO<sub>3</sub>/Ni<sub>3</sub>S<sub>2</sub> heterojunctions for high stably hydrogen evolution

Tongming Sun,<sup>a#</sup> Weiting Zhong,<sup>a#</sup> Mengke Zhang,<sup>a</sup> Yanfeng Tang,<sup>a,b</sup> Jin Wang,<sup>a,b</sup> Chen Xu,<sup>a\*</sup> Lanping Hu<sup>a\*</sup> and Minmin Wang<sup>a,b\*</sup>

*a. School of Chemistry and Chemical Engineering, Nantong University, Nantong 226019, China*

*b. Nantong Key Laboratory of Intelligent and New Energy Materials*

\* Corresponding author: Email: [mmwang0528@ntu.edu.cn](mailto:mmwang0528@ntu.edu.cn);

Email: [hlp@ntu.edu.cn](mailto:hlp@ntu.edu.cn);

Email: [xchenlihai@163.com](mailto:xchenlihai@163.com)

#These authors contributed equally to this work.

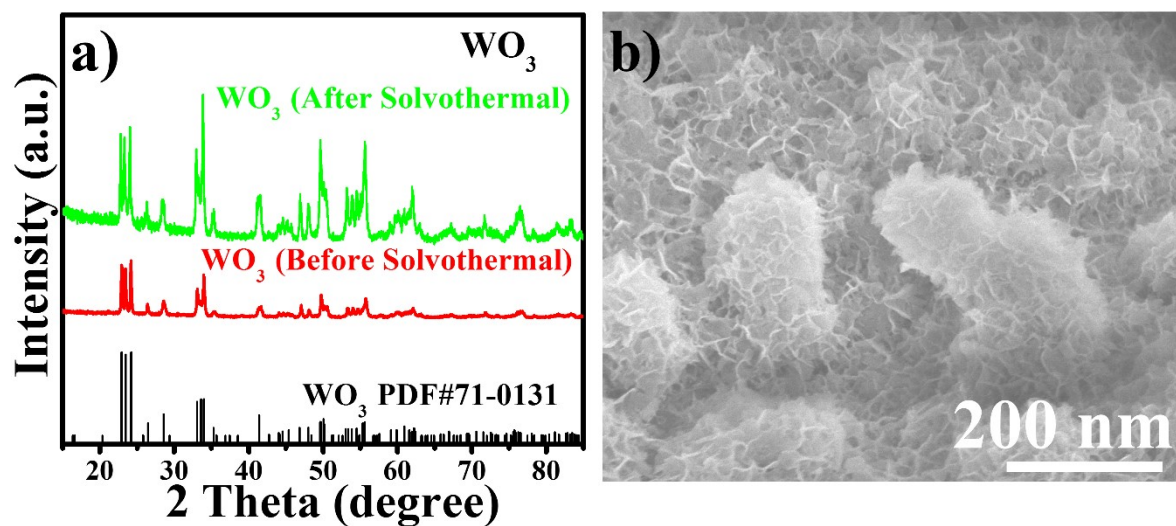

**Figure S1** (a) PXRD patterns of  $\text{WO}_3$  nanosheets before and after solvothermal process. (b) SEM image of 2D  $\text{WO}_3/\text{Ni}_3\text{S}_2$  heterojunction nanosheets.

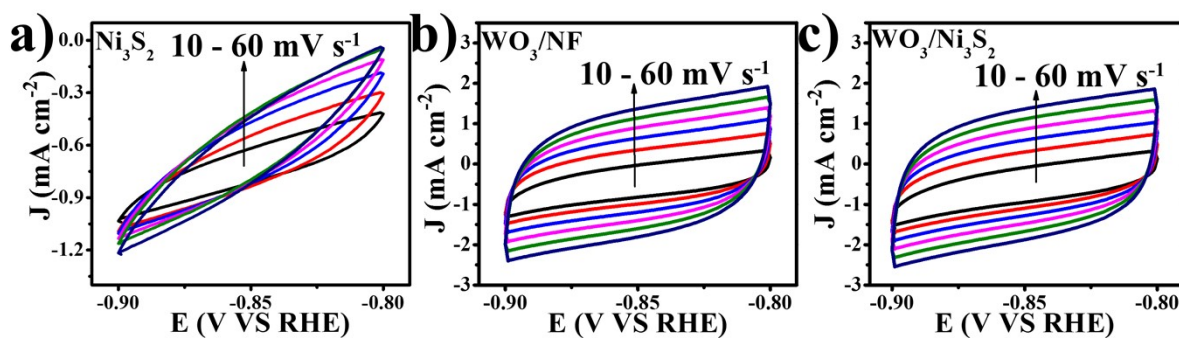

**Figure S2** Cyclic voltammograms of electrodes of (a)  $\text{Ni}_3\text{S}_2$ , (b)  $\text{WO}_3/\text{NF}$ , and (c)  $\text{WO}_3/\text{Ni}_3\text{S}_2$  electrodes from -0.8 V to -0.9 V under 10 - 60  $\text{mV s}^{-1}$ .

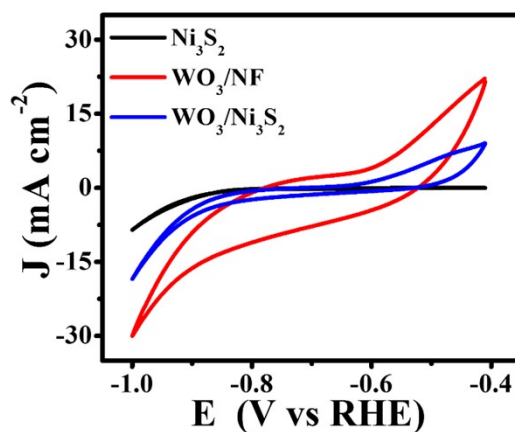

**Figure S3** CV curves of three electrodes in 1M PBS at a scan rate of 50  $\text{mV s}^{-1}$  for HER from -0.4 V to -1.0 V.

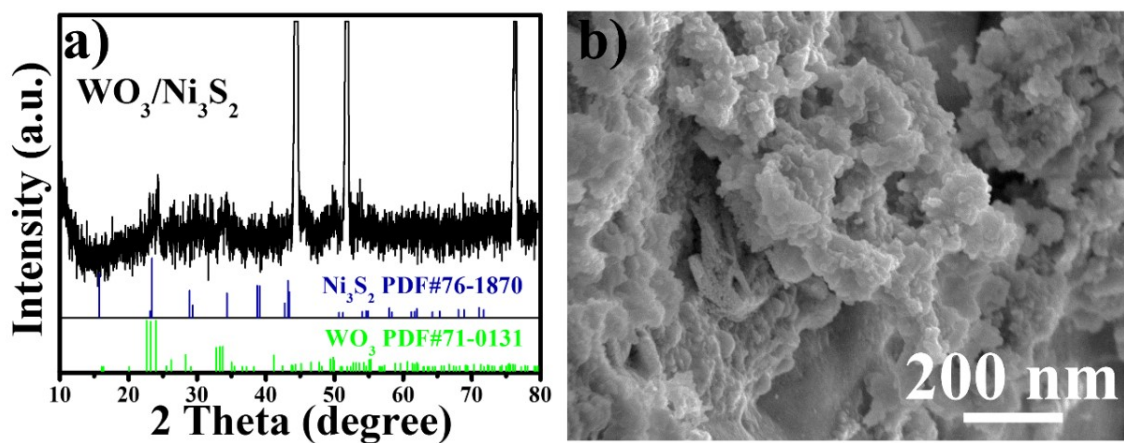

**Figure S4** (a) PXRD patterns of  $\text{WO}_3/\text{Ni}_3\text{S}_2$  sample after long time test. (b) SEM pattern of  $\text{WO}_3/\text{Ni}_3\text{S}_2$  sample after long time test.

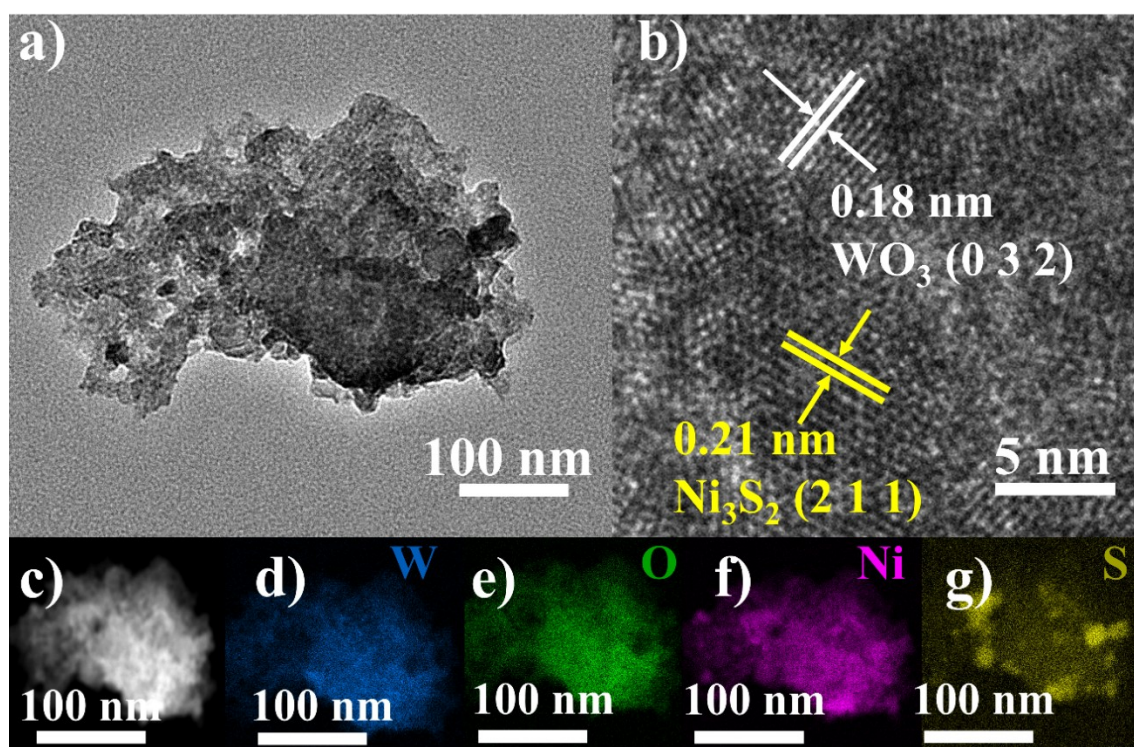

**Figure S5** (a) TEM patterns of  $\text{WO}_3/\text{Ni}_3\text{S}_2$  sample after long time test. (b) HRTEM image of  $\text{WO}_3/\text{Ni}_3\text{S}_2$  heterojunction after long time test. (c-g) HAADF-STEM image and corresponding elemental mapping images of  $\text{WO}_3/\text{Ni}_3\text{S}_2$  heterojunction after long time test.

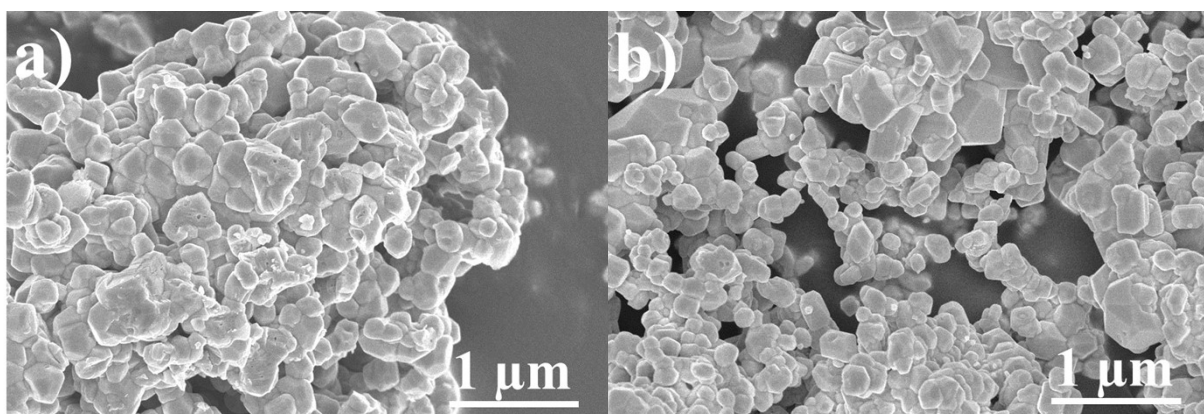

**Figure S6** (a) SEM pattern of  $\text{WO}_3$  sample before solvothermal. (b) SEM of pattern of  $\text{WO}_3$  sample after solvothermal.

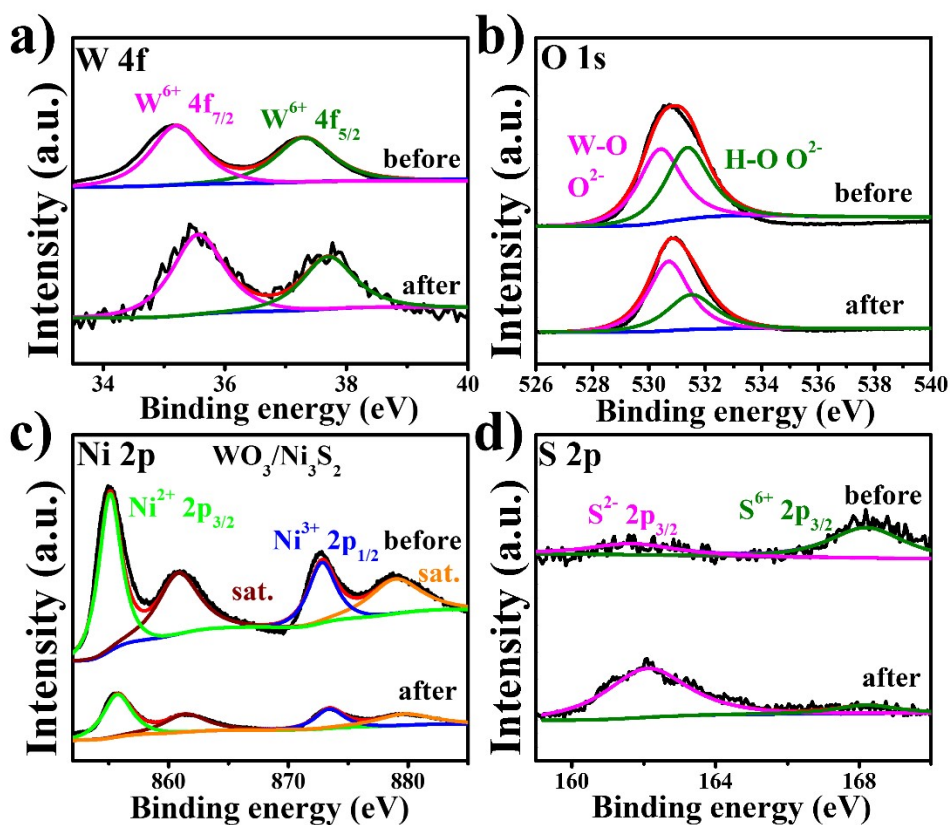

**Figure S7** (a-d) High-resolution XPS spectra of W 4f, O 1s, Ni 2p, and S 2p in  $\text{WO}_3/\text{Ni}_3\text{S}_2$  heterojunction before and after long-time testing, respectively.

**Table S1** Comparison of catalytic performance with the most recently reported HER catalysts.

| HER catalyst                          | Overpotential (mV)       |                           | Reference        |
|---------------------------------------|--------------------------|---------------------------|------------------|
|                                       | J=10 mA cm <sup>-2</sup> | J=100 mA cm <sup>-2</sup> |                  |
| $\text{WO}_3/\text{Ni}_3\text{S}_2$   | <b>100</b>               | <b>~148</b>               | <b>This work</b> |
| $\text{NiWO}_4/\text{Ni}_3\text{S}_2$ | 136                      | ~173                      | 1                |
| $\text{W(OH)}_x$                      | 110                      | ~290                      | 2                |
| $\text{WO}_3/\text{C}$ @ CoO/NF       | 90                       | ~178                      | 3                |
| $\text{Ni}_2\text{P-WO}_3$            | 105                      | ~98                       | 4                |

**Table S2** Comparison of electrochemical  $C_{dl}$  and surface area (ECSA) catalysts.

| HER catalyst                              | $C_{dl}$ (mF cm <sup>-2</sup> ) | ECSA (cm <sup>2</sup> ) | Reference        |
|-------------------------------------------|---------------------------------|-------------------------|------------------|
| $\text{WO}_3/\text{Ni}_3\text{S}_2$       | <b>4.91</b>                     | <b>122.75</b>           | <b>This work</b> |
| $\text{NiWO}_4/\text{Ni}_3\text{S}_2$ -16 | 2.88                            | 72                      | 1                |
| $\text{Ni}_3\text{S}_2/\text{CC}$         | 5                               | 125                     | 5                |
| Fe- $\text{WS}_2$ @CC                     | 1.6                             | 40                      | 6                |
| Mo- $\text{NiP}_x/\text{NiS}_y$           | 2.9                             | 72.5                    | 7                |

## References

1. H. Senchuan, M. Yuying, C. Yangfei, Y. Fen, H. Zhujie, W. Xuxu, P. Hui and W. Mingmei, Amorphous NiWO<sub>4</sub> Nanoparticles Boosting the Alkaline Hydrogen Evolution Performance of Ni<sub>3</sub>S<sub>2</sub> Electrocatalysts, *Applied Catalysis B: Environmental*, 2020, **274**, 119-120.
2. L. Zhang, P. F. Liu, Y. H. Li, C. W. Wang, M. Y. Zu, H. Q. Fu, X. H. Yang and H. G. Yang, Accelerating Neutral Hydrogen Evolution with Mungsten Modulated Amorphous Metal Hydroxides, *ACS Catalysis*, 2018, **8**, 5200-5205.
3. Y. Lv, Y. Liu, C. Chen, T. Wang and M. Zhang, Octopus Tentacles-Like WO<sub>3</sub>/C@CoO as High Property and Long Life-Time Electrocatalyst for Hydrogen Evolution Reaction, *Electrochimica Acta*, 2018, **281**, 1-8.
4. B. Wang, L. Wang, Y. Qian, Y. Yang, T. T. Isimjan and X. Yang, Construction of a Self-Supporting Ni<sub>2</sub>P-WO<sub>3</sub> Heterostructure for Highly Efficient Hydrogen Evolution Under Both Caustic and Acidic Conditions, *Sustainable Energy & Fuels*, 2021, **5**, 2884-2892.
5. Z. Liyang, Z. Yujie, W. Jiacheng, Y. Geng, Z. Ben, H. Junjie, X. Junmin, T. Frauenheim and L. Meng, Ni/Mo Bimetallic-Oxide-Derived Heterointerface-Rich Sulfide Nanosheets with Co-Doping for Efficient Alkaline Hydrogen Evolution by Boosting Volmer Reaction, *ACS Nano*, 2021, **17**, 730.
6. P. Dasu Ram, P. Uday Narayan, S. Thangjam Ibomcha, G. Chandan Chandru, K. Nam Hoon and L. Joong Hee, Fe and P Doped 1T-Phase Enriched WS<sub>2</sub> Dendritic Nanostructures for Efficient Overall Water Splitting, *Applied Catalysis B: Environmental*, 2021, **286**, 9897.
7. W. Jin, Z. Mengke, Y. Guanglong, S. Wenwu, Z. Weiting, W. Xunyue, W. Minmin, S. Tongming and T. Yanfeng, Heterogeneous Bimetallic Mo-NiP<sub>x</sub>/NiS<sub>y</sub> as a Highly Efficient Electrocatalyst for Robust Overall Water Splitting, *Advanced Functional Materials*, 2021, **8**, 2101532.
